# Supplementary material for: miR-375-3p suppresses tumorigenesis and partially reverses chemoresistance by targeting YAP1 and SP1 in colorectal cancer cells
Source: PubMed Central journal article supplement (PMC6781994; doi:10.18632/aging.102214), 2019-09-22
Supplement: aging-11-102214-s003.pdf [file aging-11-102214-s003.pdf]

SUPPLEMENTARY FIGURES

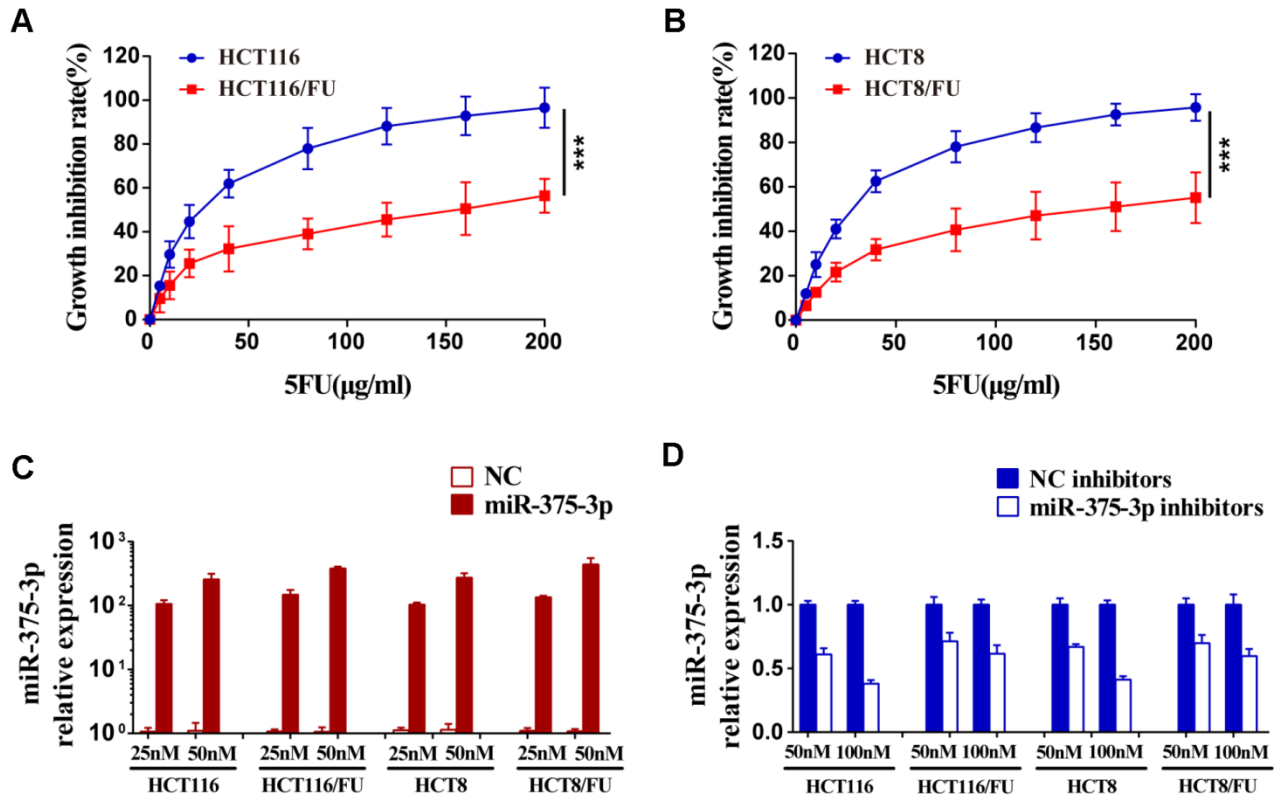

**Supplementary Figure 1. Quantitative PCR analysis in CRC.** (A, B) Cell Counting kit-8 (CCK-8) assay was used to assess the inhibition growth of parental and resistant cell lines (HCT116, HCT116/FU and HCT8, HCT8/FU) in response to 5FU (0, 5, 10, 20, 40, 80, 120, 160 and 200 µg/ml). (C) Quantitative PCR analysis. HCT116, HCT116/FU, HCT8 and HCT8/FU cells were transfected with miR-375-3p mimics (miR-375-3p) or NC mimics (NC) (25 or 50 nM). The expression levels of miR-375-3p were measured. (D) Quantitative PCR analysis. HCT116, HCT116/FU, HCT8 and HCT8/FU cells were transfected with miR-375-3p inhibitors or NC inhibitors (50 or 100 nM). The expression levels of miR-375-3p were measured. \**P* < 0.05, \*\**P* < 0.01 and \*\*\**P* < 0.001. All assays were performed in triplicate and values represent the mean of three independent experiments.

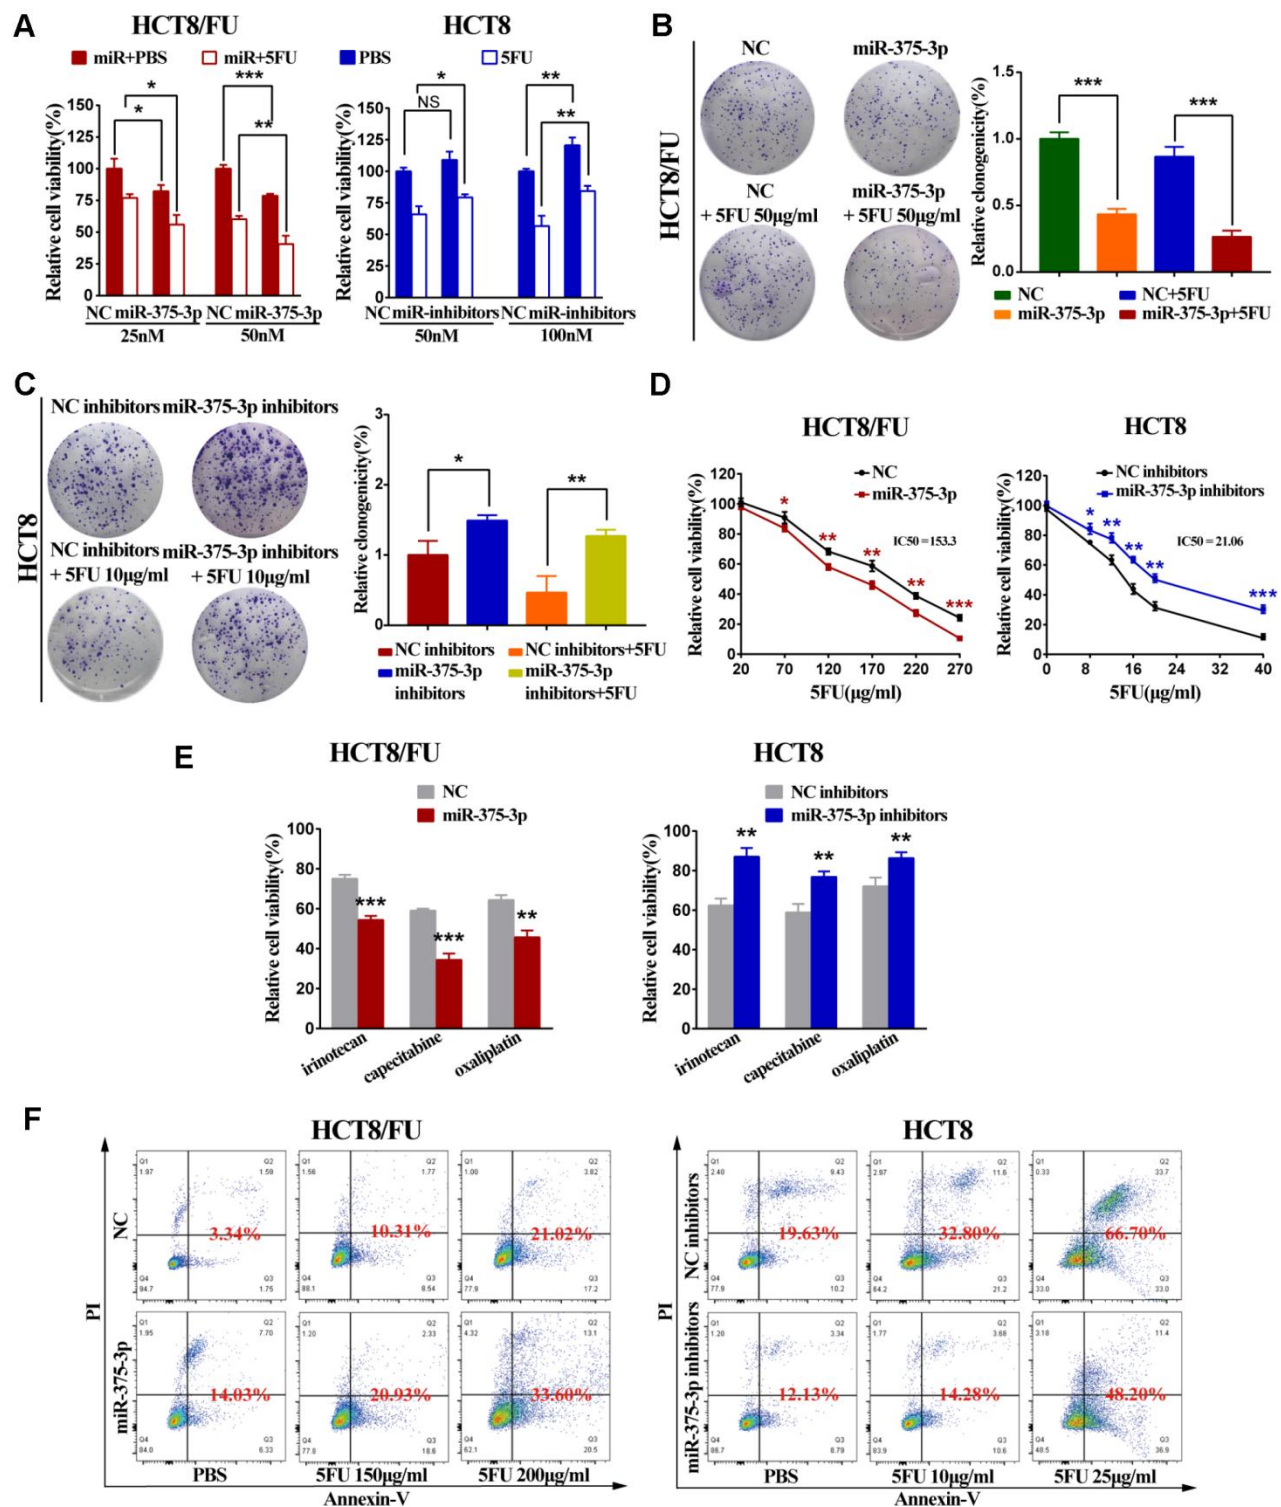

**Supplementary Figure 2. miR-375-3p inhibits proliferation, chemoresistance and promotes 5FU-induced apoptosis of CRC cells *in vitro*.** (A–D) HCT8 and HCT8/FU cells were transfected with miR-375-3p mimics or inhibitors, respectively. cell viability assay, colony formation assay and MTT assay were measured. (E) The sensitivity of HCT8/FU(left) and HCT8(right) cells to multiple anticancer drugs were measured. (HCT8/FU cells: oxaliplatin 15µg/ml, irinotecan: 100µg/ml, capecitabine: 40µg/ml; HCT8 cells: oxaliplatin 2.5µg/ml, irinotecan: 18µg/ml, capecitabine: 4µg/ml). (F) The apoptosis assay of HCT8/FU and HCT8 cells with special treatments were performed by flow cytometry analysis. (Left: HCT8/FU cells, concentration groups of 5FU: 150µg/ml and 200µg/ml; Right: HCT8 cells, concentration groups of 5FU: 10µg/ml and 25µg/ml). \* $P < 0.05$ , \*\* $P < 0.01$  and \*\*\* $P < 0.001$ .

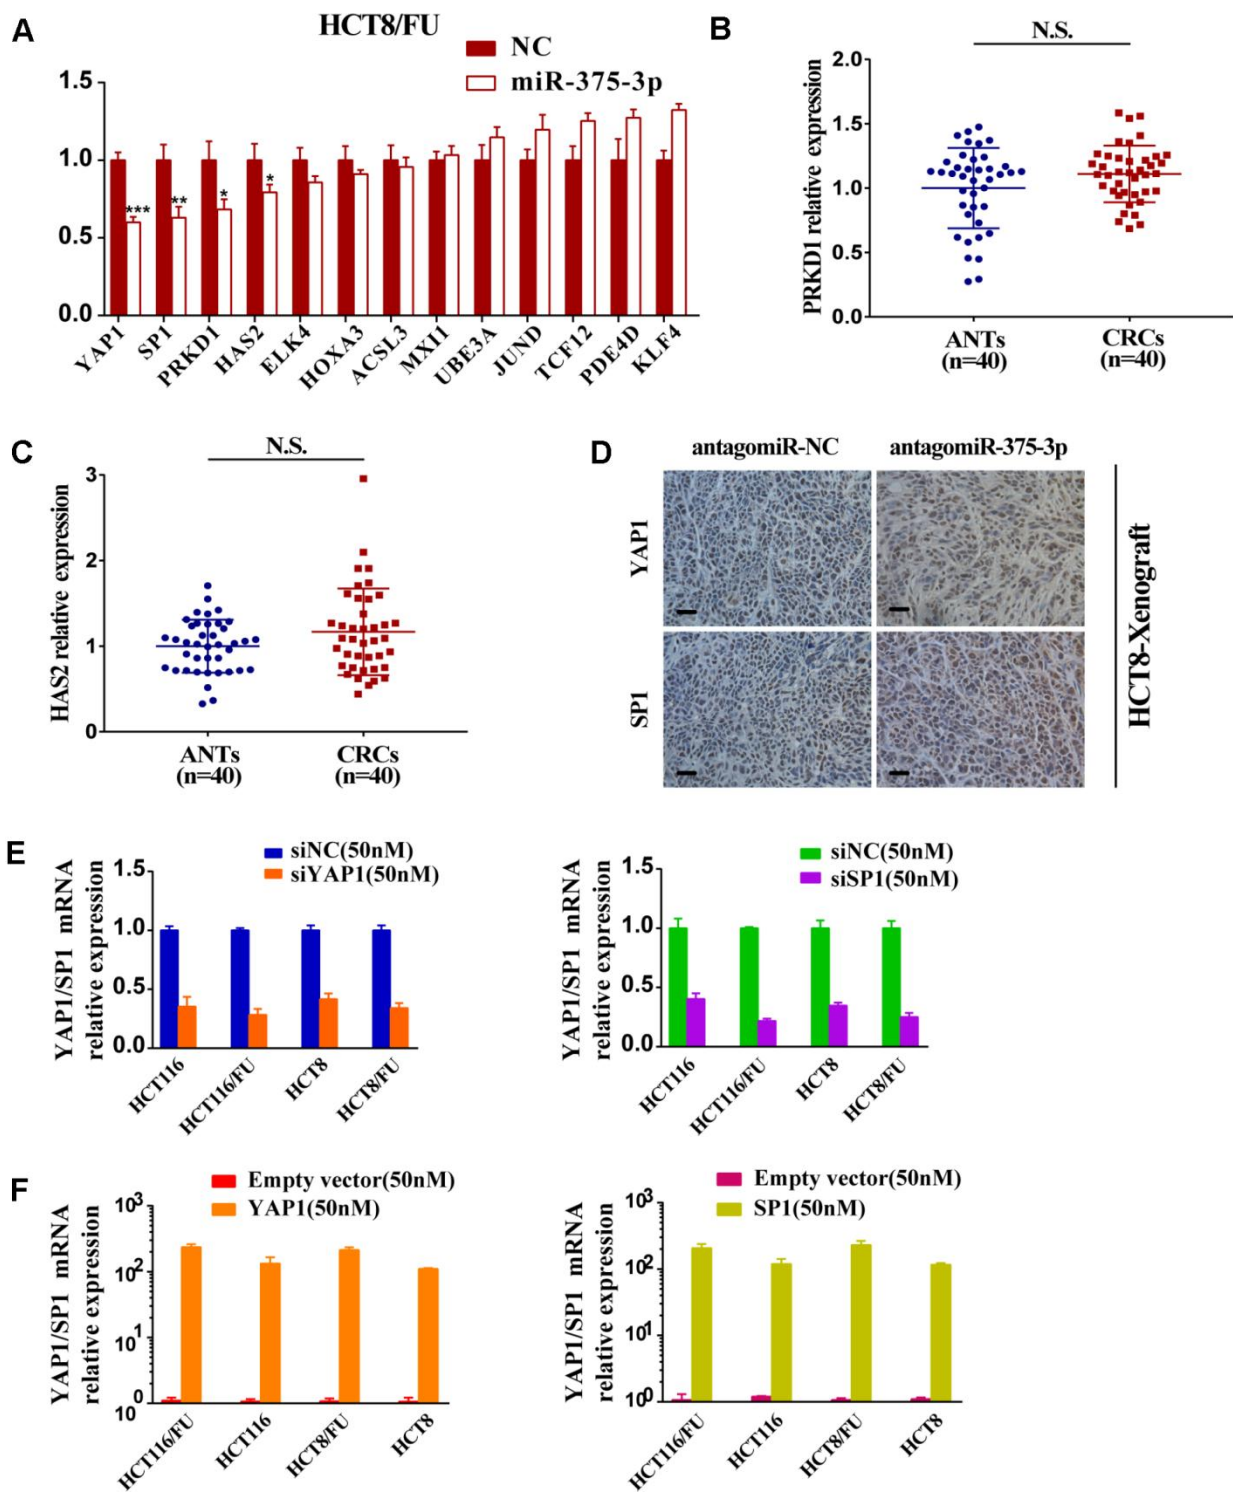

**Supplementary Figure 3. Analysis of miR-375 candidate target genes in CRC, including quantitative PCR and IHC.** (A) The mRNA expressions of 13 candidate targets were analyzed in HCT8/FU cells transfected with miR-375-3p/NC mimics. (B, C) Quantitative PCR analysis. The mRNA expression levels of PRKD1 and HAS2 in tumor tissues were compared with that in normal tissues in CRC patients (n = 40, respectively). (D) Representative images of tumor samples in HCT8-xenograft that were stained with YAP1 and SP1 by IHC. Scale bar=50µm. (E) Quantitative PCR analysis. HCT116, HCT116/FU, HCT8 and HCT8/FU cells were transfected with YAP1/SP1 siRNA (50 nM) or siNC (50 nM). The expression levels of YAP1/SP1 were measured. (F) Quantitative PCR analysis. HCT116, HCT116/FU, HCT8 and HCT8/FU cells were transfected with YAP1/SP1 overexpression plasmids (50 nM) or corresponding empty vectors (50 nM). The expression levels of YAP1/SP1 were measured. \*P < 0.05, \*\*P < 0.01 and \*\*\*P < 0.001.

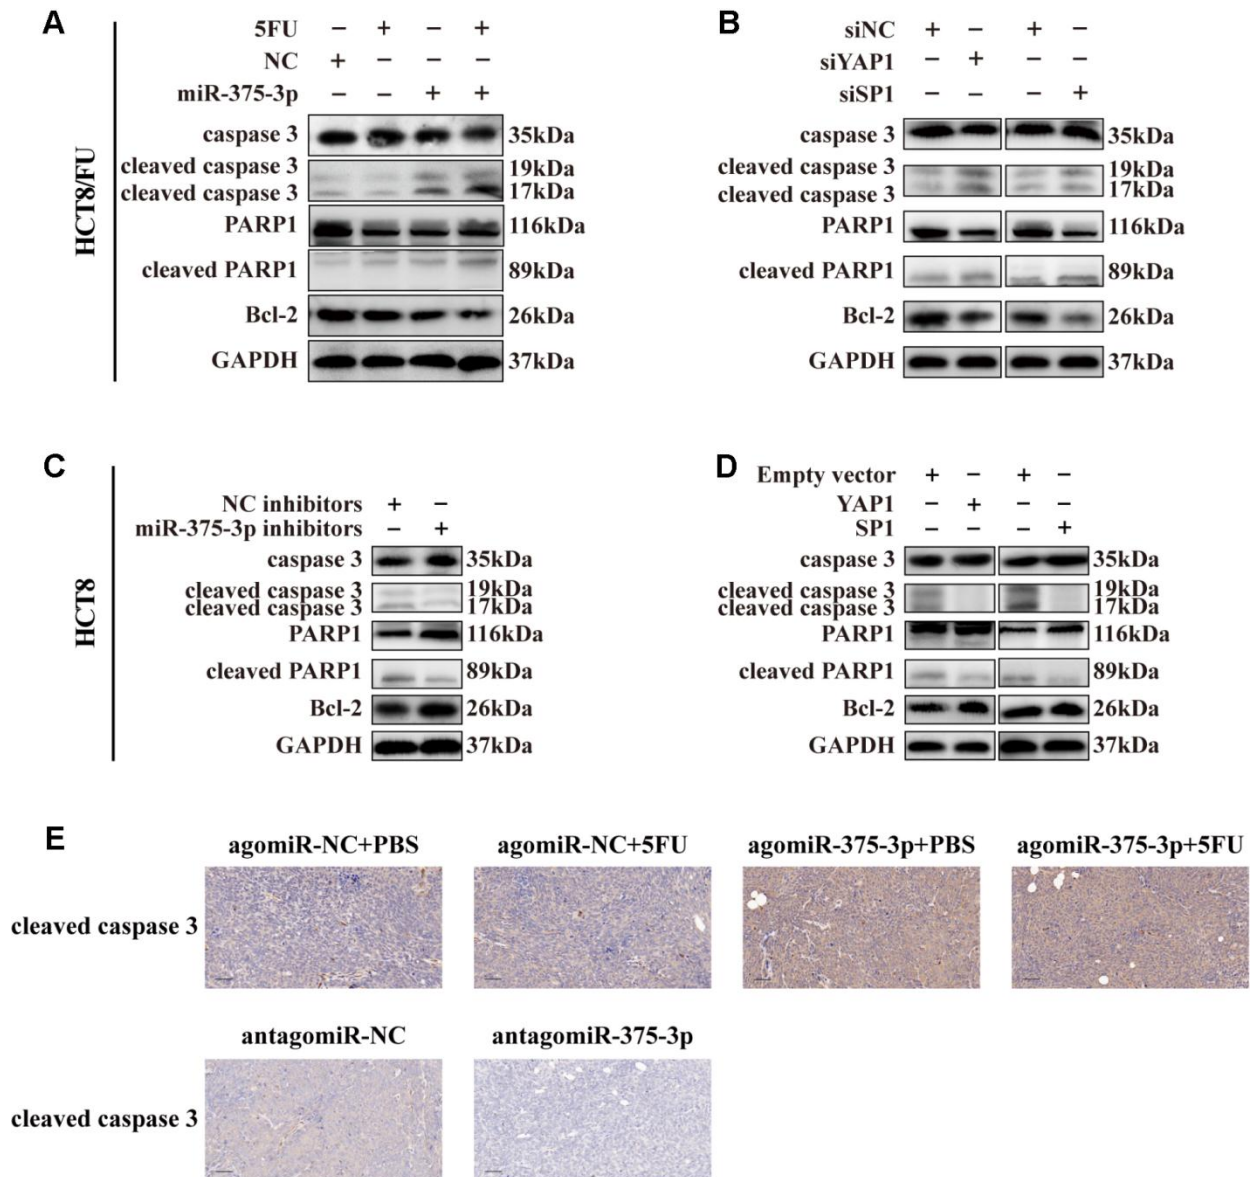

**Supplementary Figure 4. Western blot results and growth inhibitory curve analysis.** (A–D) The expression levels of apoptosis-related proteins in HCT8/FU and HCT8 cells were measured by western blotting according to specific treatments. (E) Representative images of cleaved caspase 3 immunostaining of tumor lumps from different groups. Scale bar=50 $\mu$ m.
