# Supplementary material for: miR-375-3p suppresses tumorigenesis and partially reverses chemoresistance by targeting YAP1 and SP1 in colorectal cancer cells
Source: publisher site journal article supplement (doi:10.18632/aging.102214), 2019-09-22
Supplement: Supplementary file [file aging-v11i18-102214-supplementary-material-SD3.pdf]

## SUPPLEMENTARY TABLES

**Supplementary Table 1. The sensitivity of parental cell lines (HCT116, HCT8) and 5FU-resistant cell lines (HCT116/FU, HCT8/FU) to anticancer drugs.**

| Drug                   | HCT116<br>IC50* (µg/ml) | HCT8<br>IC50* (µg /ml) | HCT116/FU<br>IC50* (µg /ml) | HCT8/FU<br>IC50* (µg /ml) |
|------------------------|-------------------------|------------------------|-----------------------------|---------------------------|
| <b>5- Fluorouracil</b> | 22.88 ± 0.14            | 25.59 ± 0.16           | 146.14 ± 15.06              | 140.22 ± 10.40            |
| <b>Irinotecan</b>      | 41.26 ± 2.82            | 43.17 ± 1.11           | 259.40 ± 2.43               | 267.03 ± 1.56             |
| <b>Capecitabine</b>    | 9.10 ± 0.22             | 8.44 ± 1.01            | 98.01 ± 5.89                | 102.00 ± 3.23             |
| <b>Oxaliplatin</b>     | 6.60 ± 1.10             | 8.00 ± 1.99            | 32.07 ± 7.58                | 33.62 ± 3.02              |

IC50\*, The IC50 values were defined as the concentration of cells inhibiting growth at 50%.

**Supplementary Table 2. Sequences for primers used in this study.**

| Name                 | Sequence                  |
|----------------------|---------------------------|
| <b>q-PCR primers</b> |                           |
| has-mir-375-3p-F     | CTTACTATCCGTTTGTTCGTTTCG  |
| has-mir-375-3p-R     | TATGGTTGTTCTCGTCTCTGTGTCT |
| U6-F                 | CAGCACATATACTAAAATTGGAACG |
| U6-R                 | ACGAATTTGCGTGTCATCC       |
| YAP1-F               | TAGCCCTGCGTAGCCAGTTA      |
| YAP1-R               | TCATGCTTAGTCCACTGTCTGT    |
| SP1-F                | TGGCAGCAGTACCAATGGC       |
| SP1-R                | CCAGGTAGTCCTGTCAGAACTT    |
| PRKD1-F              | TTCTCCCACCTCAGGTCATC      |
| PRKD1-R              | TGCCAGAGCACATAACGAAG      |
| HAS2-F               | GCCTCATCTGTGGAGATGGT      |
| HAS2-R               | ATGCACTGAACACACCCAAA      |
| ELK4-F               | CTGGTGCCAAGACCTCTAGC      |
| ELK4-R               | TCGGCTGGATTCTCAGTCTT      |
| HOXA3-F              | TCATTTAAGAGCGCCTGGACA     |
| HOXA3-R              | GAGCTGTCGTAGTAGGTGCGC     |
| ACSL3-F              | TGCTTTCCGAAGCTGCTATT      |
| ACSL3-R              | AAGGCATCTGTCACCAGACC      |
| MXI1-F               | TGGCTACGCCTCTTCATCC       |
| MXI1-R               | CTGTTGGCAGTGCTGGTGT       |
| UBE3A-F              | CCATGGGAAAATGTACATCCA     |
| UBE3A-R              | TTTTTCAGCTGGTTGTGGAGG     |
| JUND-F               | TCAAGACCCTCAAAGCCAGAA     |
| JUND-R               | TTGACGTGGCTGAGGACTTTC     |
| TCF12-F              | GCTCGACGCTAGGATCTGAC      |
| TCF12-R              | GCTTTCCACGACGGTGAC        |
| PDE4D-F              | AGGGTCTGGGCTGATTCTC       |
| PDE4D-R              | GTTGATGGATGGTTGGTTGC      |
| KLF4-F               | AAGCCAAAGAGG GGAAGACG     |
| KLF4-R               | GTGCCTGGTCAGTTCATCTGAG    |
| GAPDH-F              | GAAGGTGAAGGTCGGAGTC       |
| GAPDH-R              | GAAGATGGTGATGGGATTTC      |

**Supplementary Table 3. Sequences for siRNAs used in this study.**

| Name                 | Sequence              |
|----------------------|-----------------------|
| <b>siRNAs</b>        |                       |
| siYAP1 # 1(sense)    | GGUGAUACUAUCAACCAAA   |
| siYAP1# 1(antisense) | CCACUAUGAUAGUUGGUUU   |
| siYAP1 # 2(sense)    | GAUGUCUCAGGAAUUGAGA   |
| siYAP1# 2(antisense) | CUACAGAGUCCUUAACUCU   |
| siYAP1 # 3(sense)    | AACUCGGCUUCAGGUCCUC   |
| siYAP1# 3(antisense) | UUGAGCCGAAGUCCAGGAG   |
| siSP1# 1(sense)      | CCUGGAGUGAUGCCUAAUATT |
| siSP1# 1(antisense)  | UAUUAGGCAUCACUCCAGGTT |
| siSP1# 2(sense)      | GUGCAAACCAACAGAUUAUTT |
| siSP1# 2(antisense)  | AUAAUCUGUUGGUUUGCACTT |

**Supplementary Table 4. Antibodies information in this study.**

|                                                |                                | Western blot    | IHC        |
|------------------------------------------------|--------------------------------|-----------------|------------|
| YAP1 Rabbit Polyclonal Antibody                | Proteintech#13584-1-AP         | 1:5000-1:50000  | 1:50-1:500 |
| SP1(D4C3) Rabbit mAb                           | Cell Signaling Technology#9389 | 1:1000          | 1:2000     |
| Ki67 Rabbit Polyclonal antibody                | Proteintech #27309-1-AP        |                 | 1:4000     |
| Caspase 3 Rabbit Polyclonal antibody           | Proteintech#19677-1-AP         | 1:500-1:1000    |            |
| PARP1 Rabbit Polyclonal antibody               | Proteintech#13371-1-AP         | 1:500-1:2000    |            |
| BCL2 Rabbit Polyclonal antibody                | Proteintech#12789-1-AP         | 1:1000-1:4000   |            |
| Cyclin D1 Mouse Monoclonal antibody            | Proteintech#60186-1-Ig         | 1:2000-1:10000  |            |
| CTGF Rabbit Polyclonal antibody                | Proteintech#23936-1-AP         | 1:500-1:1000    |            |
| SURVIVIN(BIRC5) Rabbit Polyclonal antibody     | Proteintech#10508-1-AP         | 1:500-1:2000    |            |
| HRP-conjugated GAPDH Mouse Monoclonal antibody | Proteintech#HRP-60004          | 1:5000-1:50000  |            |
| GAPDH Rabbit Polyclonal antibody               | Proteintech#10494-1-AP         | 1:10000-1:40000 |            |
| Goat Anti-Mouse IgG antibody                   | Bioss#bs-0296G                 | 1:5000          |            |
| Goat Anti-rabbit IgG antibody                  | Bioss#bs-0295G                 | 1:5000          |            |

**Supplementary Table 5. Clinical characteristics of CRC patients who received 5FU-based chemotherapeutic treatment.**

| <b>Patient(S*/R*)</b> | <b>Age</b> | <b>Gender(F*/M*)</b> | <b>Pathological diagnosis</b> | <b>TNM</b>                                   | <b>Weeks of treatment</b> |
|-----------------------|------------|----------------------|-------------------------------|----------------------------------------------|---------------------------|
| S1                    | 54         | F                    | CRC                           | T <sub>3</sub> N <sub>1</sub> M <sub>1</sub> | 24                        |
| S2                    | 52         | M                    | CRC                           | T <sub>2</sub> N <sub>2</sub> M <sub>0</sub> | 21                        |
| S3                    | 36         | F                    | CRC                           | T <sub>2</sub> N <sub>0</sub> M <sub>0</sub> | 24                        |
| S4                    | 36         | M                    | CRC                           | T <sub>3</sub> N <sub>1</sub> M <sub>0</sub> | 16                        |
| S5                    | 58         | M                    | CRC                           | T <sub>3</sub> N <sub>1</sub> M <sub>0</sub> | 22                        |
| S6                    | 63         | F                    | CRC                           | T <sub>2</sub> N <sub>1</sub> M <sub>0</sub> | 15                        |
| S7                    | 51         | M                    | CRC                           | T <sub>3</sub> N <sub>2</sub> M <sub>0</sub> | 16                        |
| S8                    | 71         | F                    | CRC                           | T <sub>3</sub> N <sub>1</sub> M <sub>0</sub> | 16                        |
| S9                    | 42         | M                    | CRC                           | T <sub>2</sub> N <sub>0</sub> M <sub>0</sub> | 19                        |
| S10                   | 34         | F                    | CRC                           | T <sub>2</sub> N <sub>2</sub> M <sub>0</sub> | 22                        |
| S11                   | 39         | F                    | CRC                           | T <sub>3</sub> N <sub>1</sub> M <sub>0</sub> | 21                        |
| S12                   | 67         | F                    | CRC                           | T <sub>3</sub> N <sub>1</sub> M <sub>1</sub> | 15                        |
| S13                   | 49         | M                    | CRC                           | T <sub>3</sub> N <sub>1</sub> M <sub>0</sub> | 12                        |
| S14                   | 59         | F                    | CRC                           | T <sub>2</sub> N <sub>1</sub> M <sub>0</sub> | 23                        |
| S15                   | 44         | F                    | CRC                           | T <sub>2</sub> N <sub>1</sub> M <sub>0</sub> | 21                        |
| S16                   | 47         | M                    | CRC                           | T <sub>3</sub> N <sub>0</sub> M <sub>0</sub> | 13                        |
| S17                   | 56         | M                    | CRC                           | T <sub>1</sub> N <sub>0</sub> M <sub>0</sub> | 13                        |
| S18                   | 48         | F                    | CRC                           | T <sub>3</sub> N <sub>1</sub> M <sub>0</sub> | 21                        |
| S19                   | 63         | M                    | CRC                           | T <sub>2</sub> N <sub>1</sub> M <sub>0</sub> | 18                        |
| S20                   | 72         | F                    | CRC                           | T <sub>1</sub> N <sub>0</sub> M <sub>0</sub> | 21                        |
| S21                   | 47         | F                    | CRC                           | T <sub>3</sub> N <sub>1</sub> M <sub>1</sub> | 21                        |
| S22                   | 31         | F                    | CRC                           | T <sub>4</sub> N <sub>1</sub> M <sub>0</sub> | 18                        |
| S23                   | 47         | M                    | CRC                           | T <sub>2</sub> N <sub>0</sub> M <sub>0</sub> | 21                        |
| S24                   | 40         | M                    | CRC                           | T <sub>3</sub> N <sub>0</sub> M <sub>0</sub> | 24                        |
| S25                   | 43         | F                    | CRC                           | T <sub>4</sub> N <sub>0</sub> M <sub>0</sub> | 20                        |
| S26                   | 58         | M                    | CRC                           | T <sub>2</sub> N <sub>1</sub> M <sub>0</sub> | 21                        |
| S27                   | 72         | M                    | CRC                           | T <sub>2</sub> N <sub>1</sub> M <sub>0</sub> | 21                        |
| S28                   | 49         | F                    | CRC                           | T <sub>4</sub> N <sub>1</sub> M <sub>0</sub> | 24                        |
| S29                   | 39         | F                    | CRC                           | T <sub>3</sub> N <sub>1</sub> M <sub>0</sub> | 11                        |
| S30                   | 51         | M                    | CRC                           | T <sub>3</sub> N <sub>2</sub> M <sub>0</sub> | 16                        |
| R1                    | 63         | M                    | CRC                           | T <sub>2</sub> N <sub>0</sub> M <sub>0</sub> | 20                        |
| R2                    | 46         | M                    | CRC                           | T <sub>1</sub> N <sub>1</sub> M <sub>0</sub> | 21                        |
| R3                    | 39         | F                    | CRC                           | T <sub>4</sub> N <sub>0</sub> M <sub>0</sub> | 15                        |
| R4                    | 58         | M                    | CRC                           | T <sub>4</sub> N <sub>1</sub> M <sub>1</sub> | 16                        |
| R5                    | 57         | M                    | CRC                           | T <sub>2</sub> N <sub>2</sub> M <sub>0</sub> | 24                        |
| R6                    | 47         | M                    | CRC                           | T <sub>2</sub> N <sub>1</sub> M <sub>0</sub> | 15                        |
| R7                    | 45         | F                    | CRC                           | T <sub>3</sub> N <sub>0</sub> M <sub>0</sub> | 21                        |
| R8                    | 28         | F                    | CRC                           | T <sub>2</sub> N <sub>0</sub> M <sub>1</sub> | 21                        |
| R9                    | 37         | M                    | CRC                           | T <sub>3</sub> N <sub>1</sub> M <sub>0</sub> | 21                        |

|     |    |   |     |                                              |    |
|-----|----|---|-----|----------------------------------------------|----|
| R10 | 46 | F | CRC | T <sub>3</sub> N <sub>0</sub> M <sub>0</sub> | 18 |
| R11 | 57 | F | CRC | T <sub>4</sub> N <sub>0</sub> M <sub>0</sub> | 24 |
| R12 | 55 | M | CRC | T <sub>3</sub> N <sub>1</sub> M <sub>0</sub> | 24 |
| R13 | 37 | F | CRC | T <sub>4</sub> N <sub>2</sub> M <sub>1</sub> | 24 |
| R14 | 49 | M | CRC | T <sub>3</sub> N <sub>0</sub> M <sub>0</sub> | 21 |
| R15 | 51 | M | CRC | T <sub>2</sub> N <sub>2</sub> M <sub>0</sub> | 24 |
| R16 | 47 | F | CRC | T <sub>4</sub> N <sub>2</sub> M <sub>1</sub> | 21 |
| R17 | 68 | M | CRC | T <sub>3</sub> N <sub>1</sub> M <sub>0</sub> | 21 |
| R18 | 61 | F | CRC | T <sub>2</sub> N <sub>1</sub> M <sub>1</sub> | 15 |
| R19 | 59 | M | CRC | T <sub>3</sub> N <sub>2</sub> M <sub>0</sub> | 27 |
| R20 | 55 | M | CRC | T <sub>2</sub> N <sub>1</sub> M <sub>0</sub> | 22 |
| R21 | 50 | M | CRC | T <sub>2</sub> N <sub>1</sub> M <sub>0</sub> | 21 |
| R22 | 63 | M | CRC | T <sub>2</sub> N <sub>0</sub> M <sub>0</sub> | 18 |
| R23 | 46 | M | CRC | T <sub>1</sub> N <sub>1</sub> M <sub>0</sub> | 17 |
| R24 | 39 | F | CRC | T <sub>4</sub> N <sub>0</sub> M <sub>0</sub> | 21 |
| R25 | 58 | M | CRC | T <sub>4</sub> N <sub>1</sub> M <sub>1</sub> | 21 |
| R26 | 57 | M | CRC | T <sub>2</sub> N <sub>2</sub> M <sub>0</sub> | 21 |
| R27 | 66 | F | CRC | T <sub>3</sub> N <sub>2</sub> M <sub>0</sub> | 22 |
| R28 | 72 | M | CRC | T <sub>3</sub> N <sub>2</sub> M <sub>0</sub> | 21 |
| R29 | 68 | F | CRC | T <sub>3</sub> N <sub>1</sub> M <sub>0</sub> | 21 |
| R30 | 59 | F | CRC | T <sub>2</sub> N <sub>1</sub> M <sub>1</sub> | 24 |

**S\***, Sensitivity, 5FU-sensitive. Patients who responded well to 5FU-based chemotherapeutic treatment;

**R\***, Relapse, 5FU-resistant. Patients who relapsed after the first 5FU-based chemotherapeutic treatment.

**F\***, Female. **M\***, Male.
